1 Title: Testing for a role of *Dnmt2* in paternal trans-generational immune priming

2 Authors: Nora K E Schulz<sup>1,2,\*</sup>, Maike F Diddens-de Buhr<sup>1</sup> & Joachim Kurtz<sup>1</sup>

3

4 <sup>1</sup> Institute for Evolution and Biodiversity

5 University of Münster

6 Hüfferstr. 1

7 48149 Münster

8 Germany

9 <sup>2</sup> Current address

10 Vanderbilt University

11 465 21st Avenue South

12 Nashville, TN37232

13 USA

14 \* Corresponding author: Nora Schulz, Email: [nora.schulz@vanderbilt.edu](mailto:nora.schulz@vanderbilt.edu)

15 **Keywords:** epigenetics, tRNA methyltransferase, tRNA methylation, *Tribolium castaneum*, immune  
16 priming, paternal effects

## 17 Abstract

18 Trans-generational effects from fathers to offspring are increasingly reported from diverse organisms,  
19 but the underlying mechanisms are often unknown. Paternal trans-generational immune priming  
20 (TGIP) was demonstrated in the red flour beetle *Tribolium castaneum*: non-infectious bacterial  
21 exposure (priming) of fathers protects their offspring against an infectious challenge. Here we studied  
22 a potential role of the *Dnmt2* (now also called *Trdnmt1*) gene, which encodes a highly conserved  
23 enzyme that provides CpG methylation to a set of tRNAs and has previously been reported to be  
24 involved in transgenerational epigenetic inheritance in mice. We first studied gene expression and  
25 found that *Dnmt2* was expressed throughout life, with high expression in testes. Knockdown of *Dnmt2*  
26 in fathers slowed down offspring larval development and increased mortality of the adult offspring  
27 upon bacterial infection. However, the observed effects were independent of the paternal priming  
28 treatment. In conclusion, our results point towards a role of *Dnmt2* for paternal effects, while  
29 elucidation of the mechanisms behind paternal TGIP needs further studies.

30

## 31 **1 Introduction**

32 Phenotypic plasticity is often enabled by epigenetic mechanisms <sup>1,2</sup>. An important epigenetic  
33 modification of nucleic acids is the covalent binding of a methyl group to a cytosine followed by a  
34 guanine, *i.e.* CpG methylation <sup>3</sup>. In insects, CpG methylation of DNA has been extensively studied <sup>4,5</sup>  
35 and is involved in many processes, such as caste determination and phase polyphenism <sup>6-10</sup>. However,  
36 this modification not only occurs on DNA, but also on a variety of RNAs<sup>11</sup>. CpG methylation is  
37 facilitated by a conserved family of enzymes called DNA methyltransferases, which are found in most  
38 but not all animals <sup>3,12</sup>. *Dnmt2* is the evolutionary most conserved member of this gene family. It can  
39 be found in many fungi, plant and animal species, sometimes occurring in the absence of any functional  
40 DNA methylation machinery <sup>13</sup>. While *Dnmt1* and *Dnmt3* are responsible for modifications of DNA,  
41 *Dnmt2* is involved in methylating three types of tRNA at the C38 position <sup>14-16</sup>. Because of this  
42 function, the human *Dnmt2* gene has been renamed to *TRDMT1* (tRNA aspartic acid methyltransferase  
43 1). However, the gene is phylogenetically related to *Dnmt* genes, and it was thus suggested to stick to  
44 its original name<sup>3</sup>The methylation mark provided by *Dnmt2* protects the tRNA molecule against  
45 cleavage, which can be induced by different stressors <sup>15</sup>. It has been shown that tRNA-derived small  
46 RNAs (tsRNAs) regulate mRNAs and therefore differences in tRNA cleavage could lead to altered  
47 phenotypes. In mice dietary stress can cause increased fragmentation of tRNAs and the resulting  
48 metabolic phenotype is paternally transmitted to the offspring through the altered levels of tsRNAs  
49 <sup>17,18</sup>.This paternal transmission is dependent on *Dnmt2*, which demonstrates the importance of this  
50 gene in non-genetic inheritance <sup>19,20</sup>.

51 The function of *Dnmt2* has also been studied in *Drosophila melanogaster*. Mutants lacking *Dnmt2*  
52 were less protected against a variety of stressors, as increased rearing temperatures led to a reduced  
53 lifespan and herbicides caused higher mortality compared to wildtype and control flies <sup>15</sup>. Furthermore,  
54 heat shock treatment of flies lacking *Dnmt2* led to the accumulation of transposable elements and  
55 changed gene expression <sup>21</sup>. Also, other studies have demonstrated that *Dnmt2* plays a crucial role in  
56 managing endogenous and exogenous RNA stress, by silencing retrotransposons and inhibiting RNA

57 virus replication<sup>22,23</sup>. It has thus been proposed that the enzyme is involved in adaptive immunity and  
58 aids in defending against or adapting to pathogens<sup>13</sup>.

59 Phenotypic plasticity, both within and across generations, is widespread in immune defence. A wealth  
60 of studies in invertebrates now provide evidence for immune priming, i.e. enhanced survival upon a  
61 secondary encounter with a pathogen<sup>24–26</sup>. In some species it has been shown that the immune priming  
62 can also be transferred to the offspring<sup>25,27,28</sup>. While maternal transfer appears to be a relatively  
63 common phenomenon, reports about paternal transgenerational immune priming (TGIP) are scarce  
64<sup>25,29</sup>. The red flour beetle, *Tribolium castaneum* is the first example where paternal TGIP against a  
65 variety of bacterial pathogens has been demonstrated<sup>29–31</sup>. However, the mechanisms underlying TGIP  
66 remain elusive. The paternal route of priming narrows down the possibilities by which effectors or  
67 information could be transferred from father to offspring and thus makes the involvement of epigenetic  
68 modifications, such as methylation of sperm RNA, especially likely<sup>26</sup>. Finally, in another beetle,  
69 *Tenebrio molitor* priming of adults and larvae decreased overall RNA methylation within the  
70 generation, hinting at a possible involvement of *Dnmt2*<sup>32</sup>.

71 *T. castaneum* possesses two Dnmt genes: one *Dnmt1* and one *Dnmt2* homolog<sup>33</sup>. The beetle seems to  
72 lack any functional levels of CpG DNA methylation<sup>4,34,35</sup>, but *Dnmt1* is nevertheless expressed across  
73 all life stages and is needed for proper embryonic development<sup>35</sup>. To our knowledge no research has  
74 been dedicated yet to study the role and function of *Dnmt2* in *T. castaneum*. We therefore used gene  
75 expression analysis and RNAi to investigate the role of this gene for paternal trans-generational effects.  
76 We combined a paternal knockdown with immune priming, to investigate whether *Dnmt2* is involved  
77 in and possibly provides the epigenetic mechanism behind paternal TGIP.

## 78 **2 Materials and methods**

### 79 2.1 Model organism

80 *T. castaneum* has become a well-established model organism in many fields of biology including  
81 evolutionary ecology. The availability of a fully sequenced genome<sup>33</sup> and molecular tools, e.g. easily  
82 established systemic RNAi and genome editing<sup>36–39</sup> allow for genetic analyses of ecologically relevant  
83 phenomena. For this study, the *T. castaneum* line Cro 1 was used, which was established from 165

84 pairs of wild caught beetles collected in Croatia in June 2010<sup>40</sup>. Beetles were maintained in plastic  
85 breeding boxes with foam stoppers to ensure air circulation. Standard breeding conditions were 30°C  
86 and 70% humidity with a 12-hour light/dark cycle. As food source 250g of heat sterilized (75°C)  
87 organic wheat flour (type550) containing 5% brewer's yeast were given.

## 88 2.2 Gene expression of *Dnmt2*

89 To assess the expression of *Dnmt2* throughout the life cycle of the beetle, the four distinct life stages  
90 were sampled: eggs (n=4 pools of 500-1000 eggs, 24h-48h post oviposition), larvae (n=7 pools of 10  
91 larvae, 14-19 days post oviposition (dpo)) pupae (n=8 pools of 6 individuals), virgin adults (n=8 pools  
92 of 6 individuals, one week after eclosion). For pupae and adults, half of the pooled samples contained  
93 females and the other half males in order to test also for differential expression between the sexes.  
94 Furthermore, gonads were dissected from unmated adult males. All samples were shock frozen in  
95 liquid nitrogen. Total RNA was extracted, and genomic DNA digested by combining Trizol (Ambion  
96 RNA by Life Technologies GmbH, Darmstadt, Germany) and chloroform treatment with the use of  
97 the Total RNA extraction kit (Promega GmbH, Mannheim, Germany) as described in Eggert *et al.*<sup>30</sup>.  
98 Extracted RNA was reverse transcribed to cDNA with the RevertAid First Strand cDNA kit (Thermo  
99 Fisher Scientific, Waltham, MA USA) using provided oligo-dTs. In the following RT qPCR with a  
100 Light-Cycler480 (Roche) and Kapa SYBR Fast (Kapa Biosystems, Sigma-Aldrich), each sample was  
101 used in two technical replicates. Further analysis was conducted as described in Eggert *et al.*<sup>30</sup> and  
102 replicates were used in further analysis if the standard deviation between their crossing point values  
103 was below 0.5, otherwise the reaction was repeated. Previously, high primer efficiency had been  
104 confirmed and where possible it was made sure that primers crossed exon-intron boundaries (Table  
105 S1). The housekeeping genes ribosomal proteins rp49 and rpl13a were used for normalization of the  
106 expression of the target genes.

## 107 2.3 Paternal *Dnmt2* knockdown and TGIP

108 We aimed to downregulate *Dnmt2* through paternal RNAi and to investigate whether this knockdown  
109 would affect paternal TGIP (Figure 1). For this, around 2000 adult beetles (one week old) were allowed

110 to lay eggs for 24h. Two weeks later, larvae were collected and put into individual wells of a 96 well  
111 plate, which contained flour and yeast. The oviposition was repeated with two further, independent  
112 cohorts on the two following days, producing three experimental replicates.

### 113 2.3.1 Paternal RNAi

114 The sex of the beetles was determined in the pupal stage, and male pupae were prepared for RNAi  
115 treatment, while females were individualized and kept for mating. For injections of dsRNA, male  
116 pupae (22 dpo) were glued with the hindmost segment of the abdomen to a glass slide to immobilize  
117 them. One glass slide held between 16 and 20 pupae. Pupae were either injected with dsRNA of the  
118 target gene *Dnmt2* or for the control of the treatment procedure with dsRNA transcribed from the  
119 *asparagine synthetase A* (*asnA*) gene found in *Escherichia coli* (RNAi control), which bears no  
120 sequence similarity to any known *T. castaneum* gene (34, Table S1). The dsRNA construct for the  
121 RNAi control was produced in our lab via cloning followed by PCR and *in vitro* transcription using  
122 the T7 MEGAscript Kit (Ambion by Life Technologies™ GmbH, Darmstadt, Germany) <sup>38</sup>. The  
123 *Dnmt2* dsRNA construct has been previously used in the ibeetle RNAi scan (33; [http://ibeetle-base.uni-](http://ibeetle-base.uni-goettingen.de/details/TC005511)  
124 [goettingen.de/details/TC005511](http://ibeetle-base.uni-goettingen.de/details/TC005511)) and was obtained from EupheriaBiotech (Dresden, Germany).  
125 Injections were carried out with a microliter injector (FemtoJet, Eppendorf AG, Hamburg, Germany)  
126 and borosilicate glass capillaries (100 mm length, 1.0 mm outside diameter, 0.021 mm wall thickness;  
127 Hilgenberg GmbH, Malsfeld, Deutschland) using dsRNA at a concentration of 1000 ng/μl dissolved  
128 in ultrapure water. We injected pupae between the second and third lowest segment of their abdomen.

129 Over the three experimental blocks a total of 583 pupae were injected with *Dnmt2* dsRNA and 585  
130 pupae served as RNAi control and were therefore injected with *asnA* dsRNA. Eclosion and survival  
131 of the procedure were recorded daily from three to six days post injection.

### 132 2.3.2 TGIP

133 When all surviving males from the RNAi treatment had reached sexual maturity seven days after  
134 eclosion, they were injected for priming with around 37,000 cells of heat-killed *B. thuringiensis* (DSM  
135 no. 2046, obtained from the German Collection of Microorganisms and Cell Cultures, DSMZ)

136 suspended in phosphate buffered saline (PBS). This treatment has successfully been used in prior TGIP  
137 experiments <sup>29,30</sup>. Bacterial cultures were grown overnight as previously described <sup>41</sup>. They were  
138 washed with PBS and heat-killed by exposure to 95°C for 30 minutes. Control groups were either  
139 injected with PBS (injection control) containing no bacterial cells or were left naïve. Injections were  
140 performed using the nanolitre injector Nanoject II (Drummond Scientific Company, Broomall, PA,  
141 USA) and individuals were injected between head and thorax. Beetles were kept individually before  
142 and after the injections. Survival of the priming procedure was recorded 24h later.

### 143 2.3.3 Gene expression after RNAi and priming treatment

144 Twenty-four hours post priming, a subgroup of males was used for gene expression analysis to confirm  
145 the knockdown of *Dnmt2*. In addition to the expression of *Dnmt2*, the expression of three immunity  
146 and stress-related genes (*hsp83*, *nimB* and *PGRP*; Table S1) was analyzed, based on a previous study  
147 showing effects of paternal priming on gene expression <sup>30</sup>. For each RNAi\*priming treatment  
148 combination and block five samples were taken consisting of a pool of two to five individuals. RNA  
149 extraction, cDNA reverse transcription and RT qPCR were performed as described above (2). Finally,  
150 we also analyzed the expression of seven transposable elements (TEs) (Table S1), because the absence  
151 of *Dnmt2* can cause the activation of TEs <sup>21</sup>. Because of the lack of polyadenylation of some TE  
152 transcripts, we used random hexamer primers for cDNA reverse transcription in this case (Thermo  
153 Fisher Scientific, Waltham, MA USA).

### 154 2.3.4 Production and development of offspring generation

155 One day after the priming procedure, single pair matings were carried out for 24h with virgin females  
156 from the same population (n=12-50 mating pairs per treatment combination and experimental  
157 replicate). Twelve days after the oviposition to produce the F1 offspring generation, larvae from each  
158 pair were counted and up to six individuals were individualized and kept for further analyses.  
159 Additionally, one larva from each mating pair that produced offspring was used for developmental  
160 checks until it died or eclosed as an adult. The development was monitored daily from 21 to 23 dpo to  
161 check for pupation and at 26 dpo we recorded the proportion of eclosed adults.

### 162 2.3.5 Gene expression in the offspring generation

163 One week after the majority of the offspring generation had eclosed, five pools per RNAi and priming  
164 treatment combination and experimental replicate were sampled for gene expression analysis. Each  
165 sample consisted of five adult beetles of unknown sex. To avoid pseudo-replication only one beetle  
166 per family was used. Again, the expression of *Dnmt2* and three potential TGIP marker genes (*hsp83*,  
167 *nimB*, *PGRP*; 26) was analyzed as described above (3).

### 168 2.3.6 Bacterial challenge of adult offspring

169 One week after their eclosion, adults of the F1 offspring generation were submitted to a potentially  
170 lethal bacterial injection (challenge). For this, bacteria from the same *B. thuringiensis* stock as for the  
171 priming were used. Again, an overnight culture from a glycerol stock was grown in liquid medium and  
172 washed in PBS. The injection procedure was similar to priming and again included an injection control  
173 and a naïve group. The dose was adjusted to around 370 live bacterial cells per animal. From every  
174 family one sibling each was used for the treatment and the controls. Again, beetles were kept  
175 individually before and after injection to avoid any cross contaminations. Survival of the challenge  
176 was recorded one day and four days post injection.

## 177 2.4 Statistics

178 All gene expression data were analyzed with the REST2009 software <sup>42</sup> as described in Eggert *et al.*  
179 <sup>30</sup>. All other analyses were performed in RStudio version 0.99.467 <sup>43</sup> under R version 3.3.3 <sup>44</sup> using  
180 additional packages lme4 <sup>45</sup> and MASS <sup>46</sup>.

181 Survival of injections for RNAi and priming in the parental generation, the fertility of the treated males  
182 as well as the development of the offspring (proportion of pupae 21-23 dpo and proportion of adults  
183 26 dpo) and their survival after bacterial challenge were analyzed in generalized linear mixed effect  
184 models (GLMMs) with the according error distributions and experimental replicate as a random factor.

## 185 3 Results

### 186 3.1 Expression of *Dnmt2*

187 Before investigating a possible function of *Dnmt2* in *T. castaneum*, we monitored expression of this  
188 gene throughout the life cycle of the beetle (i.e. in eggs, larvae, pupae and adults). The levels of  
189 *Dnmt2* transcripts (relative to two housekeeping genes) in eggs and pupae closely resembled those in  
190 adults (eggs: relative expression=0.932, n=4, p=0.76; pupae: relative expression=0.989, n=8, p=0.94;  
191 Figure 2a). Larvae expressed detectable amounts of *Dnmt2*, but significantly less than adults (relative  
192 expression=0.352, n=7, p<0.001; Figure 2a). Additionally, *Dnmt2* appears to serve functions in both  
193 males and females as its expression did not differ significantly between the sexes for pupae (female:  
194 relative expression=0.784, n=4, p=0.23) or adults (female: relative expression=0.709, n=4, p=0.14).  
195 Furthermore, we analyzed the expression of *Dnmt2* in the reproductive tissue of the male beetles and  
196 compared it to whole body samples of the same sex, because expression in the testes could hint to a  
197 possible relevance of the protein in male reproduction or even an involvement in the transfer of  
198 information from father to offspring as possibly needed for TGIP. *Dnmt2* mRNA levels in the testes  
199 were significantly higher than in whole-body samples (relative expression=2.497, n=6, p=0.001;  
200 Figure 2b).

### 201 3.2 Paternal *Dnmt2* knockdown and TGIP

202 To determine whether *Dnmt2* is involved in the paternal transfer of immunity, we combined a  
203 knockdown with paternal TGIP treatment and exposed the offspring to a bacterial challenge (Figure  
204 1).

#### 205 3.2.1 Survival of RNAi and priming injections

206 The RNAi treatment with *Dnmt2* dsRNA did not increase mortality of the treated pupae (Figure S1).  
207 Injections of dsRNA in male pupae did not significantly alter survival rates neither directly following  
208 the RNAi treatment (GLMM, df=1,  $X^2=0.04$ , p=0.84, Figure S1a) nor after the priming treatment in  
209 the mature adults ten days later (GLMM, df=1,  $X^2=0.16$ , p=0.69; Figure S1b). The priming procedure  
210 itself led to a significantly increased mortality. However, the effect size was small and independent of  
211 whether the beetles were injected with heat killed bacteria or the PBS treatment control, which can be



212 attributed to the wounding during these injections as none of the naïve individuals died (GLMM,  $df=2$ ,  
213  $X^2=15.89$ ,  $p<0.001$ ; Figure S1b).

### 214 3.2.2 Knockdown of *Dnmt2*

215 One day after the priming procedure, we confirmed the knockdown of *Dnmt2* after pupal RNAi in a  
216 subgroup of the adults. *Dnmt2* was significantly downregulated compared to RNAi control regardless  
217 of the received priming treatment (Table 1). As expected, *Dnmt2* mRNA levels had returned to normal  
218 in the adult offspring and there were no significant differences between the RNAi treatments detectable  
219 (Table 1). Additionally, the paternal priming procedure did not affect *Dnmt2* expression in the adult  
220 offspring (Table 1).

### 221 3.2.3 Knockdown of *Dnmt2* and adult priming did not affect male fertility

222 Neither the knockdown of *Dnmt2* nor the bacterial priming appear to affect the fitness of the treated  
223 individuals, as neither treatment significantly altered male fertility. The number of live offspring  
224 obtained from a 24 h single pair mating period did not differ significantly for either of the treatments  
225 (GLMM: RNAi,  $df=1$ ,  $X^2=2.11$ ,  $p=0.15$ ; priming,  $df=2$ ,  $X^2=0.44$ ,  $p=0.80$ ; Figure S2).

### 226 3.2.4 Paternal knockdown of *Dnmt2* but not priming affected offspring development

227 We monitored offspring development by measuring the proportion of pupae over three consecutive  
228 days and the proportion of eclosed adults 26 days post oviposition (dpo). Animals from all six  
229 treatment combinations of RNAi and priming showed similar pupation rates 21 and 22 dpo (Figure 3a,  
230 Figure S3a). However, at 23 dpo significantly less larvae had reached pupation in the *Dnmt2* paternal  
231 knockdown group than in the RNAi control, independent of paternal priming treatment (GLMM:  
232 RNAi,  $df=1$ ,  $X^2=3.9$ ,  $p<0.05$ ; priming,  $df=2$ ,  $X^2=0.19$ ,  $p=0.91$ ; Figure 3a). The proportion of eclosed  
233 adults 26 dpo was not significantly affected by any paternal treatment (GLMM: RNAi,  $df=1$ ,  $X^2=0.04$ ,  
234  $p=0.84$ ; priming,  $df=2$ ,  $X^2=0.48$ ,  $p=0.79$ ; Figure S3b).

### 235 3.2.5 Expression of TGIP marker genes and TEs is not affected by *Dnmt2* knockdown or priming

236 In fathers and offspring alike, we measured the expression of three genes, which are related to stress  
237 or immune responses and were previously shown to be upregulated in the adult offspring of primed  
238 fathers (26). By measuring the expression in the fathers, we intended to see whether these genes would  
239 already be affected within the treated generation. None of the three candidate genes (*hsp83*, *nimB* and  
240 *PGRP*) showed any significant differential expression neither in the paternal nor in the adult offspring  
241 generation (Table S2).

242 For the same animals from the paternal generation we also measured the expression of seven TEs.  
243 Genencher *et al.*<sup>21</sup> observed that the absence of *Dnmt2* and the exposure to heat stress led to the  
244 activation and accumulation of certain TEs in *D. melanogaster*. Here, we could not observe any  
245 significant upregulation in the expression of TEs after wounding or priming in the knockdown or  
246 control treatment (Table S3).

#### 247 3.2.6 Paternal *Dnmt2* knockdown reduces offspring survival after bacterial challenge

248 Finally, we injected adult beetles from the offspring generation with a potentially lethal dose of  
249 *B. thuringiensis* to see whether the immune priming was transmitted to the offspring and if this was  
250 affected by the downregulation of *Dnmt2* in the fathers. Paternal priming treatment did not affect  
251 offspring survival after bacterial challenge (GLMM,  $df=2$ ,  $X^2=0.17$ ,  $p=0.92$ ; Figure S4), which can  
252 possibly be explained by the unavoidable additional wounding that all fathers were subjected to  
253 because of the RNAi injection treatment. However, offspring of individuals that had received a  
254 knockdown were significantly less likely to survive the bacterial challenge (GLMM,  $df=2$ ,  $X^2=7.78$ ,  
255  $p<0.01$ ; Figure 3), demonstrating that *Dnmt2* is involved in paternal effects and that its reduction can  
256 increase the offspring's susceptibility to pathogens in the beetle.

## 257 4 Discussion

258 *Dnmt2* can be found in almost every eukaryote species and is the most conserved member of the Dnmt  
259 family<sup>47</sup>. It also has a function in some organisms lacking one or both other Dnmts and which are  
260 often devoid of any functional DNA methylation system<sup>13</sup>. This also appears to be the case in  
261 *T. castaneum*, which lacks *Dnmt3* and does not have any functional CpG DNA methylation<sup>4,33-35</sup>, but

262 still expresses *Dnmt2*. Although, we know today that *Dnmt2* methylates tRNA and not DNA, it remains  
263 unclear what the role of this epigenetic mechanism is. We observed that *Dnmt2* mRNA transcripts are  
264 present at relatively low but consistent levels in all life stages and in both sexes of the beetle, therefore  
265 the enzyme likely functions in both males and females and throughout the entire life cycle. In fruit  
266 flies, mice and humans, *Dnmt2* canonically methylates a small set of tRNAs<sup>14,15,48</sup>, which are highly  
267 abundant in sperm<sup>49</sup> and have been shown to be involved in paternal transmission of metabolic  
268 phenotypes in mice<sup>17,18</sup>. The significantly higher expression of *Dnmt2* that we observed in testes of  
269 *T. castaneum* could hint at the involvement of *Dnmt2* in paternal epigenetic inheritance also in this  
270 beetle.

271 We used systemic paternal RNAi, to investigate how a *Dnmt2* knockdown would affect offspring  
272 phenotypes and to discover a potential role of this gene in intergenerational epigenetic inheritance,  
273 specifically from father to offspring. The offspring of *Dnmt2* RNAi-treated fathers needed longer to  
274 reach pupation and were less well dealing with a *B. thuringiensis* infection, which may point towards  
275 a generally higher stress sensitivity. In recent years, it has become clear that biological functions of  
276 *Dnmt2* are more easily detected under stress conditions<sup>13</sup>. Increased sensitivity to thermal and  
277 oxidative stress has been observed in *D. melanogaster* *Dnmt2* mutants<sup>15</sup>, while overexpression of the  
278 same gene led to increased stress tolerance<sup>50</sup>. During the stress response, *Dnmt2* appears to control  
279 the fragmentation of tRNA and can be located at cellular stress compartments<sup>15,51</sup>. More recently, it  
280 has also been demonstrated that the knockout of *Dnmt2* leads to a decline of immune function with  
281 ageing in adult flies<sup>52</sup>. Finally, its absence disrupts the small interfering RNA pathway by inhibiting  
282 dsRNA degradation by *Dicer*<sup>51</sup>. However, all these effects occur in the treated generation and have  
283 not been tested for an offspring generation. In our case the developmental and immunological effects  
284 were observed in the offspring of treated fathers, even though offspring themselves exhibited normal  
285 *Dnmt2* expression, which suggests transgenerational effects. A role in transgenerational paternal  
286 effects for *Dnmt2* has so far only been established in mice, where the gene is essential for the  
287 transmission of an acquired metabolic disorder<sup>19</sup>. Therefore, further studies are needed to clarify the  
288 role that *Dnmt2* plays in enabling appropriate stress responses within and across generations.

289 Finally, we combined the knockdown of *Dnmt2* with a TGIP treatment, to determine whether this  
290 enzyme is involved in the transfer of priming information from father to offspring. We did not observe  
291 any TGIP in the present study, as offspring survival was independent of the paternal priming treatment.  
292 Furthermore, we did not observe any upregulation in the previously described marker genes for  
293 immune and stress responses<sup>30</sup> or any changes in the expression of transposable elements. This  
294 surprising lack of any observable difference between offspring of primed and control males might have  
295 been caused by the injection of all males for the pupal RNAi treatment that took place in the pupal  
296 stage, before the priming treatment in the adult stage (note that we included an RNAi control, but did  
297 not have a fully naïve control for the RNAi treatment, Fig. 1). The wounding associated with the  
298 dsRNA injection might have activated immune responses, such that all animals could already have  
299 entered a ‘primed’ state. To our knowledge there are no studies that directly address the question how  
300 injuries during the pupal phase influence later immune responses. However, some experiments show  
301 that wounding in control treatments also to a certain extent may increase survival of a subsequent  
302 bacterial challenge<sup>29,53</sup>. Alternatively, the pupal RNAi injections might have inhibited priming. Lastly,  
303 although TGIP in *T. castaneum* is robust and repeatable<sup>29,30,53</sup>, it also has become apparent that this  
304 phenomenon cannot be observed in every experiment<sup>53</sup> and beetle population<sup>54</sup>.

305 We did not observe any effects of the *Dnmt2* knockdown on expression of the studied TEs, in contrast  
306 to *D. melanogaster Dnmt2* mutants that showed increased TE expression<sup>21</sup>. However, further studies  
307 would be needed to make any firm conclusions, because the lack of expression differences for a limited  
308 set of TEs does not exclude the possibility that *Dnmt2* plays a role in the regulation of TEs in *T.*  
309 *castaneum*.

310 In plants, flies and mice the absence of *Dnmt2* is not lethal under standard conditions and mutants  
311 remain fertile<sup>14</sup>. The same appears to be true in the case of *T. castaneum*, where we did not observe  
312 any mortality nor apparent phenotypic changes after a significant downregulation of *Dnmt2*.  
313 Additionally, male fertility was not affected by the knockdown under *ad libitum* conditions. Therefore,  
314 the maintenance of knockout lines appears feasible, which makes this gene a suitable target for  
315 CRISPR/Cas knockout to further study its function without the necessity of repeated RNAi injections

316 for each experiment. Moreover, methylation-sensitive sequencing of sperm RNA could further  
317 elucidate the underlying molecular processes.

318 In conclusion, our study for the first time describes paternal effects of *Dnmt2* in an invertebrate. The  
319 here observed prolonged development and increased susceptibility to infection in the offspring  
320 occurred in the presence of normal *Dnmt2* expression in the offspring themselves. Therefore, tRNA  
321 methylation in sperm provides a fascinating possibility of transmitting information from fathers to  
322 offspring through paternal epigenetic inheritance.

323

## 324 References

- 325 1. Feinberg, A. P. Phenotypic plasticity and the epigenetics of human disease. *Nature* **447**, 433–  
326 440 (2007).
- 327 2. Duncan, E. J., Gluckman, P. D. & Dearden, P. K. Epigenetics, plasticity, and evolution: How  
328 do we link epigenetic change to phenotype? *J. Exp. Zool. Part B Mol. Dev. Evol.* **322**, 208–  
329 220 (2014).
- 330 3. Lyko, F. The DNA methyltransferase family: a versatile toolkit for epigenetic regulation. *Nat.*  
331 *Rev. Genet.* **19**, 81–92 (2018).
- 332 4. Bewick, A. J., Vogel, K. J., Moore, A. J. & Schmitz, R. J. Evolution of DNA methylation  
333 across insects. *Mol. Biol. Evol.* **34**, 654–665 (2017).
- 334 5. Provataris, P. *et al.* Signatures of DNA methylation across insects suggest reduced DNA  
335 methylation levels in Holometabola. *Genome Biol. Evol.* **10**, 1185–1197 (2018).
- 336 6. Ernst, U. R. *et al.* Epigenetics and locust life phase transitions. *J. Exp. Biol.* **218**, 88–99  
337 (2015).
- 338 7. Pasquier, C. *et al.* Environmentally selected aphid variants in clonality context display  
339 differential patterns of methylation in the genome. *PLoS One* **9**, e115022 (2014).
- 340 8. Falckenhayn, C. *et al.* Characterization of genome methylation patterns in the desert locust  
341 *Schistocerca gregaria*. *J. Exp. Biol.* **216**, 1423–9 (2013).
- 342 9. Elango, N., Hunt, B. G., Goodisman, M. a D. & Yi, S. V. DNA methylation is widespread

- 343 and associated with differential gene expression in castes of the honeybee, *Apis mellifera*.  
344 *Proc. Natl. Acad. Sci. U. S. A.* **106**, 11206–11 (2009).
- 345 10. Kucharski, R., Maleszka, J., Foret, S. & Maleszka, R. Nutritional control of reproductive  
346 status in honeybees via DNA methylation. *Science*. **319**, 1827–1830 (2008).
- 347 11. Rana, A. K. & Ankri, S. Reviving the RNA world: An insight into the appearance of RNA  
348 methyltransferases. *Frontiers in Genetics* **7**, 99 (2016).
- 349 12. Goll, M. G. & Bestor, T. H. Eukaryotic cytosine methyltransferases. *Annu. Rev. Biochem.* **74**,  
350 481–514 (2005).
- 351 13. Durdevic, Z. & Schaefer, M. *Dnmt2* methyltransferases and immunity: An ancient  
352 overlooked connection between nucleotide modification and host defense? *BioEssays* **35**,  
353 1044–1049 (2013).
- 354 14. Goll, M. G. *et al.* Methylation of tRNA Asp by the DNA methyltransferase homolog Dnmt2.  
355 *Science* **311**, 395–398 (2006).
- 356 15. Schaefer, M. *et al.* RNA methylation by *Dnmt2* protects transfer RNAs against stress-induced  
357 cleavage. *Genes Dev.* **24**, 1590–1595 (2010).
- 358 16. Raddatz, G. *et al.* Dnmt2-dependent methylomes lack defined DNA methylation patterns.  
359 *Proc. Natl. Acad. Sci.* **110**, 8627–31 (2013).
- 360 17. Chen, Q. *et al.* Sperm tsRNAs contribute to intergenerational inheritance of an acquired  
361 metabolic disorder. *Science*. **351**, 397–400 (2016).
- 362 18. Sharma, U. *et al.* Biogenesis and function of tRNA fragments during sperm maturation and  
363 fertilization in mammals. *Science*. **351**, 391–396 (2016).
- 364 19. Zhang, Y. *et al.* *Dnmt2* mediates intergenerational transmission of paternally acquired  
365 metabolic disorders through sperm small non-coding RNAs. *Nat. Cell Biol.* **20**, 535–540  
366 (2018).
- 367 20. Zhang, Y., Shi, J., Rassoulzadegan, M., Tuorto, F. & Chen, Q. Sperm RNA code programmes  
368 the metabolic health of offspring. *Nat. Rev. Endocrinol.* **15**, 489–498 (2019).
- 369 21. Genencher, B. *et al.* Mutations in Cytosine-5 tRNA methyltransferases impact mobile  
370 element expression and genome stability at specific DNA repeats. *Cell Rep.* **22**, 1861–1874

- 371 (2018).
- 372 22. Phalke, S. *et al.* Retrotransposon silencing and telomere integrity in somatic cells of  
373 *Drosophila* depends on the cytosine-5 methyltransferase DNMT2. *Nat. Genet.* **41**, 696–702  
374 (2009).
- 375 23. Durdevic, Z. *et al.* Efficient RNA virus control in *Drosophila* requires the RNA  
376 methyltransferase *Dnmt2*. *EMBO Rep.* **14**, 269–75 (2013).
- 377 24. Schmid-Hempel, P. Natural insect host-parasite systems show immune priming and  
378 specificity: puzzles to be solved. *BioEssays* **27**, 1026–1034 (2005).
- 379 25. Milutinović, B. & Kurtz, J. Immune memory in invertebrates. *Semin. Immunol.* **28**, 328–342  
380 (2016).
- 381 26. Roth, O., Beemelmans, A., Barribeau, S. M. & Sadd, B. M. Recent advances in vertebrate  
382 and invertebrate transgenerational immunity in the light of ecology and evolution. *Heredity.*  
383 **121**, 225–238 (2018).
- 384 27. Kurtz, J. & Armitage, S. A. O. Dissecting the dynamics of trans-generational immune  
385 priming. *Mol. Ecol.* **26**, 3857–3859 (2017).
- 386 28. Zanchi, C., Troussard, J.-P., Moreau, J. & Moret, Y. Relationship between maternal transfer  
387 of immunity and mother fecundity in an insect. *Proc. R. Soc. B Biol. Sci.* **279**, 3223–3230  
388 (2012).
- 389 29. Roth, O. *et al.* Paternally derived immune priming for offspring in the red flour beetle,  
390 *Tribolium castaneum*. *J. Anim. Ecol.* **79**, 403–413 (2010).
- 391 30. Eggert, H., Kurtz, J. & Diddens-de Buhr, M. F. Different effects of paternal trans-  
392 generational immune priming on survival and immunity in step and genetic offspring. *Proc.*  
393 *R. Soc. B Biol. Sci.* **281**, (2014).
- 394 31. Schulz, N. K. E., Sell, M. P., Ferro, K., Kleinhöfing, N. & Kurtz, J. Transgenerational  
395 developmental effects of immune priming in the red flour beetle *Tribolium castaneum*. *Front.*  
396 *Physiol.* **10**, (2019).
- 397 32. Castro-Vargas, C. *et al.* Methylation on RNA: A potential mechanism related to immune  
398 priming within but not across generations. *Front. Microbiol.* **8**, 1–11 (2017).

- 399 33. Richards, S. *et al.* The genome of the model beetle and pest *Tribolium castaneum*. *Nature*  
400 **452**, 949–55 (2008).
- 401 34. Zemach, A., Mcdaniel, I. E., Silva, P. & Zilberman, D. Genome-wide evolutionary analysis  
402 of eukaryotic DNA methylation. *Science* **328**, 916–9 (2010).
- 403 35. Schulz, N. K. E. *et al.* *Dnmt1* has an essential function despite the absence of CpG DNA  
404 methylation in the red flour beetle *Tribolium castaneum*. *Sci. Rep.* **8**, 16462 (2018).
- 405 36. Bucher, G., Scholten, J. & Klingler, M. Parental RNAi in *Tribolium* (Coleoptera). *Curr. Biol.*  
406 **12**, R85-6 (2002).
- 407 37. Schmitt-Engel, C. *et al.* The iBeetle large-scale RNAi screen reveals gene functions for insect  
408 development and physiology. *Nat. Commun.* **6**, 7822 (2015).
- 409 38. Peuß, R. *et al.* Down syndrome cell adhesion molecule 1 : testing for a role in insect  
410 immunity, behaviour and reproduction. *R. Soc. Open Sci.* **3**, 160138 (2016).
- 411 39. Gilles, A. F. & Averof, M. Functional genetics for all: Engineered nucleases, CRISPR and the  
412 gene editing revolution. *Evodevo* **5**, 1–13 (2014).
- 413 40. Milutinović, B., Stolpe, C., Peuß, R., Armitage, S. A. O. & Kurtz, J. The red flour beetle as a  
414 model for bacterial oral infections. *PLoS One* **8**, (2013).
- 415 41. Roth, O. & Kurtz, J. Phagocytosis mediates specificity in the immune defence of an  
416 invertebrate, the woodlouse *Porcellio scaber* (Crustacea: Isopoda). *Dev. Comp. Immunol.* **33**,  
417 1151–5 (2009).
- 418 42. Pfaffl, M. W., Horgan, G. W. & Dempfle, L. Relative expression software tool (REST) for  
419 group-wise comparison and statistical analysis of relative expression results in real-time PCR.  
420 *Nucleic Acids Res.* **30**, e36 (2002).
- 421 43. RStudio Team. R-Studio: integrated development for R. (2015).
- 422 44. R Development Core Team. R: A language and environment for statistical computing.  
423 (2008).
- 424 45. Bates, D., Mächler, M., Bolker, B. & Walker, S. Fitting Linear Mixed-Effects Models Using  
425 lme4. *J. Stat. Softw.* **67**, 1–48 (2015).
- 426 46. Venables, W. N. & Ripley, B. D. *Modern Applied Statistics with S.* (Springer New York,



- 427 2002). doi:10.1007/978-0-387-21706-2
- 428 47. Schaefer, M. & Lyko, F. Solving the *Dnmt2* enigma. *Chromosoma* **119**, 35–40 (2010).
- 429 48. Jurkowski, T. P. *et al.* Human DNMT2 methylates tRNA(Asp) molecules using a DNA  
430 methyltransferase-like catalytic mechanism. *RNA* **14**, 1663–70 (2008).
- 431 49. Peng, H. *et al.* A novel class of tRNA-derived small RNAs extremely enriched in mature  
432 mouse sperm. *Cell Res.* **22**, 1609–12 (2012).
- 433 50. Lin, M.-J., Tang, L.-Y., Reddy, M. N. & Shen, C.-K. J. DNA methyltransferase gene *dDnmt2*  
434 and longevity of *Drosophila*. *J. Biol. Chem.* **280**, 861–4 (2005).
- 435 51. Durdevic, Z., Mobin, M. B., Hanna, K., Lyko, F. & Schaefer, M. The RNA methyltransferase  
436 *Dnmt2* is required for efficient Dicer-2-dependent siRNA pathway activity in *Drosophila*.  
437 *Cell Rep.* **4**, 931–937 (2013).
- 438 52. Abhyankar, V., Kaduskar, B., Kamat, S. S., Deobagkar, D. & Ratnaparkhi, G. S. *Drosophila*  
439 DNA/RNA methyltransferase contributes to robust host defense in ageing animals by  
440 regulating sphingolipid metabolism. *J. Exp. Biol.* jeb.187989 (2018). doi:10.1242/jeb.187989
- 441 53. Tate, A. T., Andolfatto, P., Demuth, J. P. & Graham, A. L. The within-host dynamics of  
442 infection in trans-generationally primed flour beetles. *Mol. Ecol.* **26**, 3794–3807 (2017).
- 443 54. Khan, I., Prakash, A. & Agashe, D. Divergent immune priming responses across flour beetle  
444 life stages and populations. *Ecol. Evol.* **6**, 7847–7855 (2016).

445

#### 446 Contributions

447 All authors conceived and designed the experiments. NS conducted the experiments, analyzed the data,  
448 and wrote the manuscripts with comments from all authors.

#### 449 Acknowledgements

450 We thank Barbara Hasert and Kathrin Brüggemann for help with lab work, Jürgen Schmitz for support  
451 regarding the expression analysis of TEs and Sina Flügge for providing us with drawings of  
452 *T. castaneum*. This work was supported in part by the Volkswagen Stiftung, project number I/84 794.

453 Tables and Figures

454 **Table 1** *Dnmt2* expression after paternal RNAi and priming in the treated males and their adult offspring. Given  
 455 is the relative expression compared to RNAi control, per priming control group, for the knockdown target gene  
 456 *Dnmt2* normalized over the expression of two housekeeping genes. Per treatment combination, generation  
 457 and three experimental replicates five samples comprising of 2-5 individuals were used.

| Gene         | Treatment    |           | P               |             |                  | F <sub>1</sub>  |             |         |
|--------------|--------------|-----------|-----------------|-------------|------------------|-----------------|-------------|---------|
|              | RNAi         | Priming   | rel. expression | 95% C.I.    | p value          | rel. expression | 95% C.I.    | p value |
| <i>Dnmt2</i> | <i>Dnmt2</i> | bacterial | <b>0.177</b>    | 0.03 - 1.73 | <b>&lt;0.001</b> | 1.116           | 0.54 - 2.04 | 0.284   |
|              |              | control   | <b>0.088</b>    | 0.04 - 0.48 | <b>&lt;0.001</b> | 1.061           | 0.53 - 1.97 | 0.530   |
|              |              | naive     | <b>0.112</b>    | 0.03 - 0.73 | <b>&lt;0.001</b> | 0.955           | 0.5 - 1.76  | 0.620   |
|              | control      | bacterial | 0.897           | 0.27 - 5.90 | 0.571            | 1.06            | 0.52 - 1.94 | 0.519   |
|              |              | naive     | 1.175           | 0.26 - 7.21 | 0.384            | 1.092           | 0.53 - 3.63 | 0.480   |

458

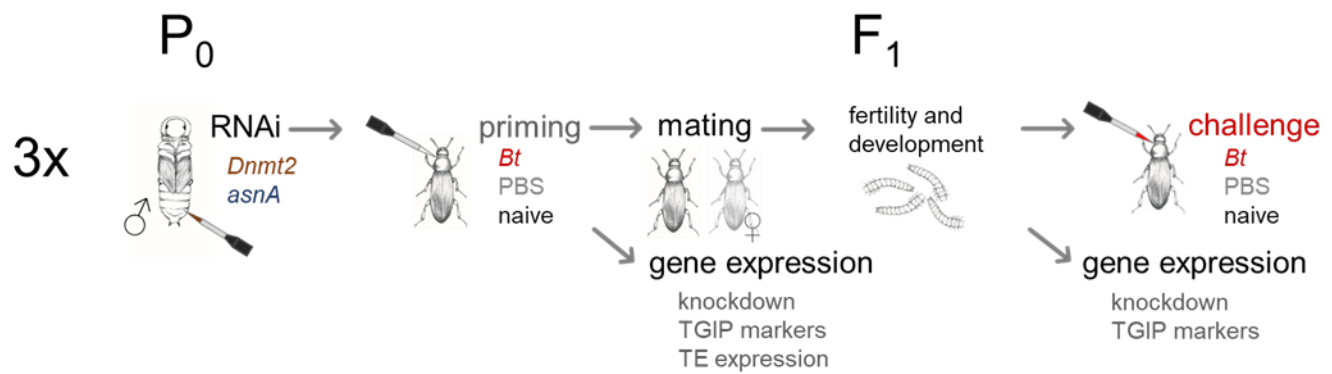

459

460 **Figure 1** Overview of the experimental design combining paternal RNAi to knockdown *Dnmt2* with paternal  
 461 TGIP. The entire experiment was conducted in three replicates (*asnA*=RNAi control; PBS=injection control;  
 462 naive=handling control).

463

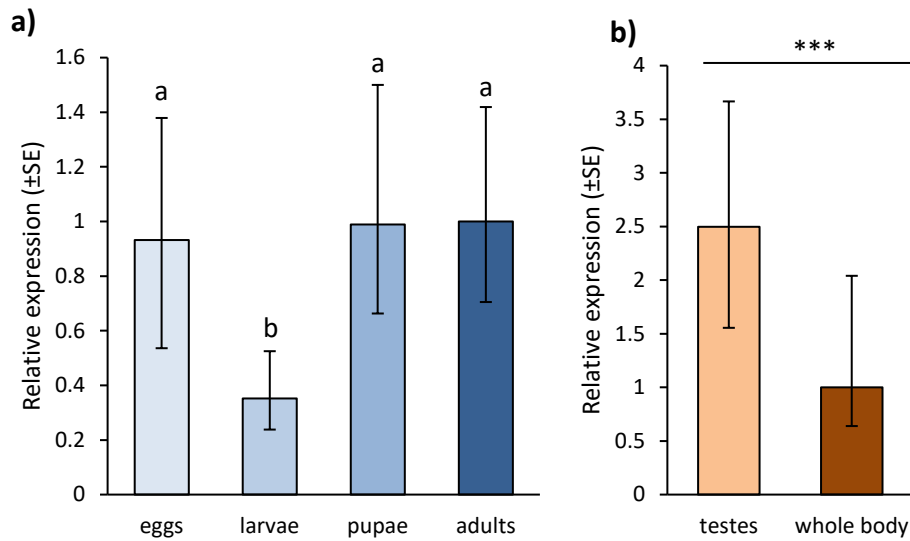

464

465 **Figure 2** *Dnmt2* gene expression **a)** Relative expression in four distinct life stages of *T. castaneum* compared  
466 to adult samples (eggs: n=4 pools of 500-1000 eggs, 24h-48h post oviposition; larvae: n=7 pools of 10 larvae,  
467 14-19 dpo; pupae: n=8 pools of 6 individuals; adults: n=8 pools of 6 individuals, one week after eclosion). **b)**  
468 Relative expression in testes and male whole-body samples (n=6). Different lettering and asterisks indicate  
469 significant differences ( $p \leq 0.001$ ).

470

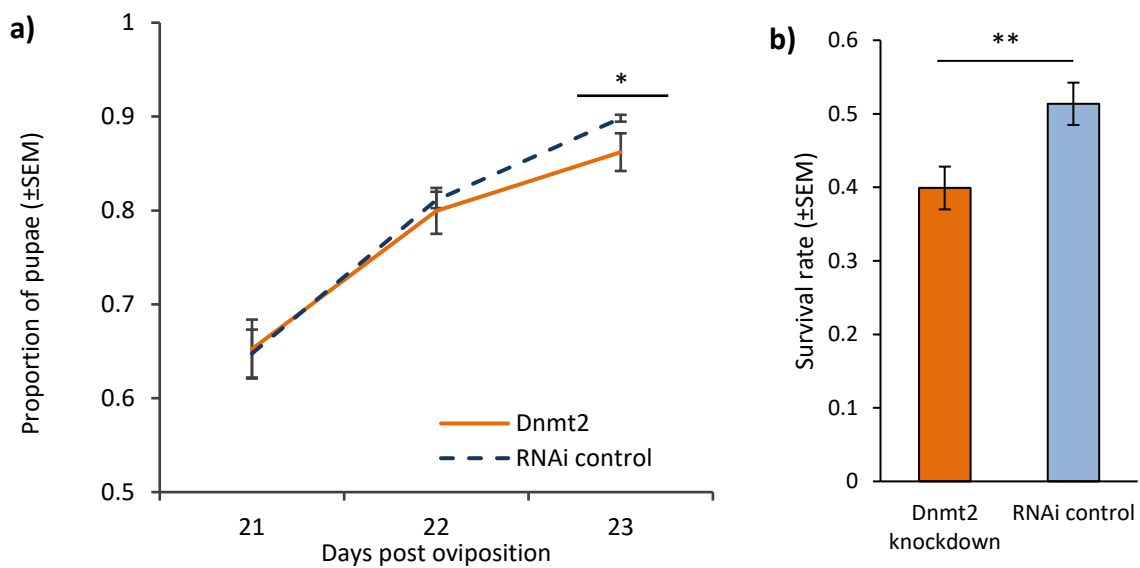

471

472 **Figure 3** Effects of paternal *Dnmt2* knock-down on offspring **a)** Pupation rate of  $F_1$  generation 21-23 dpo (±SEM  
473 for three experimental replicates) **b)** Survival of the  $F_1$  generation after bacterial challenge according to  
474 paternal RNAi treatment. Shown are the proportions of adults that were alive four days post injection with a  
475 of *B. thuringiensis* (±SEM for three experimental replicates). Asterisks indicate significant differences  
476 (\*= $p < 0.05$ , \*\*= $p < 0.01$ ).
